# Supplementary material for: Timing and causes of death after endovascular thrombectomy in patients with acute ischemic stroke
Source: PubMed Central journal article supplement — Eur Stroke J. 2022 Dec 14;8(1):215–23. doi: 10.1177/23969873221143210 (PMC10069200; doi:10.1177/23969873221143210), 2022-12-14
Supplement: sj-pdf-1-eso-10.1177_23969873221143210.pdf [file sj-pdf-1-eso-10.1177_23969873221143210.pdf]

## SUPPLEMENTARY MATERIAL

### Timing and causes of death after endovascular thrombectomy in patients with acute ischemic stroke

Wouter M. Sluis, Wouter H. Hinsenveld, Robert-Jan B. Goldhoorn, Lianne H. Potters, Agnetha A.E. Bruggeman, Anouk van der Hoorn, Joseph C.J. Bot,

Robert J. van Oostenbrugge, Hester F. Lingsma, Jeannette Hofmeijer, Wim H. van Zwam, Charles B.L.M. Majoie, H. Bart van der Worp

|                 | <b>Title</b>                                                       | <b>Page</b> |
|-----------------|--------------------------------------------------------------------|-------------|
| <b>Table 1</b>  | RECORD checklist                                                   | 2           |
| <b>Figure 1</b> | Flowchart of patient inclusion                                     | 12          |
| <b>Figure 2</b> | Cumulative survival stratified by NIHSS at 24-48H                  | 13          |
| <b>Table 2</b>  | Sensitivity analysis without imputed data                          | 14          |
| <b>Table 3</b>  | Predictor values with a missing percentage of 5% or higher         | 16          |
| <b>Table 4</b>  | Difference in determined causes of death between part 1 and part 2 | 17          |
| <b>Table 5</b>  | MR CLEAN Registry Investigators                                    | 20          |

**Table 1. The RECORD statement – checklist of items, extended from the STROBE statement, that should be reported in observational studies using routinely collected health data.**

|                           | <b>Item No.</b> | <b>STROBE items</b>                                                                                                                                                                        | <b>Location in manuscript where items are reported</b> | <b>RECORD items</b>                                                                                                                                                                                                                                                                                                                                                                                                                                | <b>Location in manuscript where items are reported</b>    |
|---------------------------|-----------------|--------------------------------------------------------------------------------------------------------------------------------------------------------------------------------------------|--------------------------------------------------------|----------------------------------------------------------------------------------------------------------------------------------------------------------------------------------------------------------------------------------------------------------------------------------------------------------------------------------------------------------------------------------------------------------------------------------------------------|-----------------------------------------------------------|
| <b>Title and abstract</b> |                 |                                                                                                                                                                                            |                                                        |                                                                                                                                                                                                                                                                                                                                                                                                                                                    |                                                           |
|                           | 1               | (a) Indicate the study’s design with a commonly used term in the title or the abstract (b) Provide in the abstract an informative and balanced summary of what was done and what was found | Page 3, line 60                                        | <p>RECORD 1.1: The type of data used should be specified in the title or abstract. When possible, the name of the databases used should be included.</p> <p>RECORD 1.2: If applicable, the geographic region and timeframe within which the study took place should be reported in the title or abstract.</p> <p>RECORD 1.3: If linkage between databases was conducted for the study, this should be clearly stated in the title or abstract.</p> | <p>Page 3, line 60</p> <p>Page 3, line 61</p> <p>n.a.</p> |
| <b>Introduction</b>       |                 |                                                                                                                                                                                            |                                                        |                                                                                                                                                                                                                                                                                                                                                                                                                                                    |                                                           |

|                      |   |                                                                                                                                 |                                               |  |  |
|----------------------|---|---------------------------------------------------------------------------------------------------------------------------------|-----------------------------------------------|--|--|
| Background rationale | 2 | Explain the scientific background and rationale for the investigation being reported                                            | Page 5, line 93-97                            |  |  |
| Objectives           | 3 | State specific objectives, including any prespecified hypotheses                                                                | Page 5, line 97-100                           |  |  |
| <b>Methods</b>       |   |                                                                                                                                 |                                               |  |  |
| Study Design         | 4 | Present key elements of study design early in the paper                                                                         | Page 6, line 103-106                          |  |  |
| Setting              | 5 | Describe the setting, locations, and relevant dates, including periods of recruitment, exposure, follow-up, and data collection | Page 6, line 103-112 and Page 6, line 120-155 |  |  |

|              |   |                                                                                                                                                                                                                                                                                                                                                                                                                                                                                                                                                                                                                                                                                                                              |                      |                                                                                                                                                                                                                                                                                                                                                                                                                                                                                                                                                                                                                                                                                                      |                                                     |
|--------------|---|------------------------------------------------------------------------------------------------------------------------------------------------------------------------------------------------------------------------------------------------------------------------------------------------------------------------------------------------------------------------------------------------------------------------------------------------------------------------------------------------------------------------------------------------------------------------------------------------------------------------------------------------------------------------------------------------------------------------------|----------------------|------------------------------------------------------------------------------------------------------------------------------------------------------------------------------------------------------------------------------------------------------------------------------------------------------------------------------------------------------------------------------------------------------------------------------------------------------------------------------------------------------------------------------------------------------------------------------------------------------------------------------------------------------------------------------------------------------|-----------------------------------------------------|
| Participants | 6 | <p>(a) <i>Cohort study</i> - Give the eligibility criteria, and the sources and methods of selection of participants. Describe methods of follow-up</p> <p><i>Case-control study</i> - Give the eligibility criteria, and the sources and methods of case ascertainment and control selection. Give the rationale for the choice of cases and controls</p> <p><i>Cross-sectional study</i> - Give the eligibility criteria, and the sources and methods of selection of participants</p> <p>(b) <i>Cohort study</i> - For matched studies, give matching criteria and number of exposed and unexposed</p> <p><i>Case-control study</i> - For matched studies, give matching criteria and the number of controls per case</p> | Page 6, line 107-112 | <p>RECORD 6.1: The methods of study population selection (such as codes or algorithms used to identify subjects) should be listed in detail. If this is not possible, an explanation should be provided.</p> <p>RECORD 6.2: Any validation studies of the codes or algorithms used to select the population should be referenced. If validation was conducted for this study and not published elsewhere, detailed methods and results should be provided.</p> <p>RECORD 6.3: If the study involved linkage of databases, consider use of a flow diagram or other graphical display to demonstrate the data linkage process, including the number of individuals with linked data at each stage.</p> | <p>Page 6, line 107-112</p> <p>n.a.</p> <p>n.a.</p> |
|--------------|---|------------------------------------------------------------------------------------------------------------------------------------------------------------------------------------------------------------------------------------------------------------------------------------------------------------------------------------------------------------------------------------------------------------------------------------------------------------------------------------------------------------------------------------------------------------------------------------------------------------------------------------------------------------------------------------------------------------------------------|----------------------|------------------------------------------------------------------------------------------------------------------------------------------------------------------------------------------------------------------------------------------------------------------------------------------------------------------------------------------------------------------------------------------------------------------------------------------------------------------------------------------------------------------------------------------------------------------------------------------------------------------------------------------------------------------------------------------------------|-----------------------------------------------------|

|                              |   |                                                                                                                                                                                             |                                                                    |                                                                                                                                                                                                                 |      |
|------------------------------|---|---------------------------------------------------------------------------------------------------------------------------------------------------------------------------------------------|--------------------------------------------------------------------|-----------------------------------------------------------------------------------------------------------------------------------------------------------------------------------------------------------------|------|
| Variables                    | 7 | Clearly define all outcomes, exposures, predictors, potential confounders, and effect modifiers. Give diagnostic criteria, if applicable.                                                   | Page 7, line 139-155 and Page 6, line 120 through Page 7, line 136 | RECORD 7.1: A complete list of codes and algorithms used to classify exposures, outcomes, confounders, and effect modifiers should be provided. If these cannot be reported, an explanation should be provided. | n.a. |
| Data sources/<br>measurement | 8 | For each variable of interest, give sources of data and details of methods of assessment (measurement).<br><br>Describe comparability of assessment methods if there is more than one group | Page 7, line 139-155 and Page 6, line 120 through Page 7, line 136 |                                                                                                                                                                                                                 |      |

|                        |    |                                                                                                                               |                                                    |  |  |
|------------------------|----|-------------------------------------------------------------------------------------------------------------------------------|----------------------------------------------------|--|--|
| Bias                   | 9  | Describe any efforts to address potential sources of bias                                                                     | Page 7, line 130-132<br>Page 8, line 164-165       |  |  |
| Study size             | 10 | Explain how the study size was arrived at                                                                                     | Page 9 line 169-173 and Figure 1 of the Supplement |  |  |
| Quantitative variables | 11 | Explain how quantitative variables were handled in the analyses. If applicable, describe which groupings were chosen, and why | n.a.                                               |  |  |

|                                  |    |                                                                                                                                                                                                                                                                                                                                                                                                                                                                                                                                                                                          |                                                                                     |                                                                                                                                                       |      |
|----------------------------------|----|------------------------------------------------------------------------------------------------------------------------------------------------------------------------------------------------------------------------------------------------------------------------------------------------------------------------------------------------------------------------------------------------------------------------------------------------------------------------------------------------------------------------------------------------------------------------------------------|-------------------------------------------------------------------------------------|-------------------------------------------------------------------------------------------------------------------------------------------------------|------|
| Statistical methods              | 12 | <p>(a) Describe all statistical methods, including those used to control for confounding (b) Describe any methods used to examine subgroups and interactions</p> <p>(c) Explain how missing data were addressed</p> <p>(d) <i>Cohort study</i> - If applicable, explain how loss to follow-up was addressed<br/> <i>Case-control study</i> - If applicable, explain how matching of cases and controls was addressed<br/> <i>Cross-sectional study</i> - If applicable, describe analytical methods taking account of sampling strategy</p> <p>(e) Describe any sensitivity analyses</p> | <p>Page 8, line 158-166</p> <p>Page 8, line 160-162</p> <p>Page 8, line 164-165</p> |                                                                                                                                                       |      |
| Data access and cleaning methods |    | ..                                                                                                                                                                                                                                                                                                                                                                                                                                                                                                                                                                                       |                                                                                     | RECORD 12.1: Authors should describe the extent to which the investigators had access to the database population used to create the study population. | n.a. |

|                |    |                                                                                                                                                                                                                                                                                                                       |                                 |                                                                                                                                                                                                                                                                                                                    |                                 |
|----------------|----|-----------------------------------------------------------------------------------------------------------------------------------------------------------------------------------------------------------------------------------------------------------------------------------------------------------------------|---------------------------------|--------------------------------------------------------------------------------------------------------------------------------------------------------------------------------------------------------------------------------------------------------------------------------------------------------------------|---------------------------------|
|                |    |                                                                                                                                                                                                                                                                                                                       |                                 | RECORD 12.2: Authors should provide information on the data cleaning methods used in the study.                                                                                                                                                                                                                    | n.a.                            |
| Linkage        |    | ..                                                                                                                                                                                                                                                                                                                    |                                 | RECORD 12.3: State whether the study included person-level, institutional-level, or other data linkage across two or more databases. The methods of linkage and methods of linkage quality evaluation should be provided.                                                                                          | n.a.                            |
| <b>Results</b> |    |                                                                                                                                                                                                                                                                                                                       |                                 |                                                                                                                                                                                                                                                                                                                    |                                 |
| Participants   | 13 | (a) Report the numbers of individuals at each stage of the study ( <i>e.g.</i> , numbers potentially eligible, examined for eligibility, confirmed eligible, included in the study, completing follow-up, and analysed)<br>(b) Give reasons for nonparticipation at each stage.<br>(c) Consider use of a flow diagram | Figure 1 of the Data Supplement | RECORD 13.1: Describe in detail the selection of the persons included in the study ( <i>i.e.</i> , study population selection) including filtering based on data quality, data availability and linkage. The selection of included persons can be described in the text and/or by means of the study flow diagram. | Figure 1 of the Data Supplement |

|                  |    |                                                                                                                                                                                                                                                                                                                                                     |                                                                                |  |  |
|------------------|----|-----------------------------------------------------------------------------------------------------------------------------------------------------------------------------------------------------------------------------------------------------------------------------------------------------------------------------------------------------|--------------------------------------------------------------------------------|--|--|
| Descriptive data | 14 | <p>(a) Give characteristics of study participants (<i>e.g.</i>, demographic, clinical, social) and information on exposures and potential confounders</p> <p>(b) Indicate the number of participants with missing data for each variable of interest (c) <i>Cohort study</i> - summarise follow-up time (<i>e.g.</i>, average and total amount)</p> | <p>Page 12, Table 2 and Page 9 line 169-171</p> <p>Data supplement Table 3</p> |  |  |
| Outcome data     | 15 | <p><i>Cohort study</i> - Report numbers of outcome events or summary measures over time</p> <p><i>Case-control study</i> - Report numbers in each exposure</p>                                                                                                                                                                                      | <p>Page 9, line 171-173 and Table 1</p>                                        |  |  |
|                  |    | <p>category, or summary measures of exposure</p> <p><i>Cross-sectional study</i> - Report numbers of outcome events or summary measures</p>                                                                                                                                                                                                         |                                                                                |  |  |



|                   |    |                                                                                                                                                                                                                                                                                                                                                                                                                 |                                                              |  |  |
|-------------------|----|-----------------------------------------------------------------------------------------------------------------------------------------------------------------------------------------------------------------------------------------------------------------------------------------------------------------------------------------------------------------------------------------------------------------|--------------------------------------------------------------|--|--|
| Main results      | 16 | (a) Give unadjusted estimates and, if applicable, confounderadjusted estimates and their precision (e.g., 95% confidence interval). Make clear which confounders were adjusted for and why they were included (b) Report category boundaries when continuous variables were categorized<br><br>(c) If relevant, consider translating estimates of relative risk into absolute risk for a meaningful time period | Page 19, line 234-241 and Table 4                            |  |  |
| Other analyses    | 17 | Report other analyses done— e.g., analyses of subgroups and interactions, and sensitivity analyses                                                                                                                                                                                                                                                                                                              | Sensitivity analysis is found in the data supplement Table 2 |  |  |
| <b>Discussion</b> |    |                                                                                                                                                                                                                                                                                                                                                                                                                 |                                                              |  |  |
| Key results       | 18 | Summarise key results with reference to study objectives                                                                                                                                                                                                                                                                                                                                                        | Page 21, line 252-260                                        |  |  |

|                          |    |                                                                                                                                                            |                                |                                                                                                                                                                                                                                                                                                          |                       |
|--------------------------|----|------------------------------------------------------------------------------------------------------------------------------------------------------------|--------------------------------|----------------------------------------------------------------------------------------------------------------------------------------------------------------------------------------------------------------------------------------------------------------------------------------------------------|-----------------------|
| Limitations              | 19 | Discuss limitations of the study, taking into account sources of potential bias or imprecision. Discuss both direction and magnitude of any potential bias | Page 22, line 288-302          | RECORD 19.1: Discuss the implications of using data that were not created or collected to answer the specific research question(s). Include discussion of misclassification bias, unmeasured confounding, missing data, and changing eligibility over time, as they pertain to the study being reported. | Page 22, line 288-302 |
| Interpretation           | 20 | Give a cautious overall interpretation of results considering objectives,                                                                                  | Page 24, line 304-309          |                                                                                                                                                                                                                                                                                                          |                       |
|                          |    | limitations, multiplicity of analyses, results from similar studies, and other relevant evidence                                                           |                                |                                                                                                                                                                                                                                                                                                          |                       |
| Generalisability         | 21 | Discuss the generalisability (external validity) of the study results                                                                                      | n.a.                           |                                                                                                                                                                                                                                                                                                          |                       |
| <b>Other Information</b> |    |                                                                                                                                                            |                                |                                                                                                                                                                                                                                                                                                          |                       |
| Funding                  | 22 | Give the source of funding and the role of the funders for the present study and, if applicable,                                                           | Separate declarations document |                                                                                                                                                                                                                                                                                                          |                       |

|                                                           |  |                                                              |      |                                                                                                                                                          |      |
|-----------------------------------------------------------|--|--------------------------------------------------------------|------|----------------------------------------------------------------------------------------------------------------------------------------------------------|------|
|                                                           |  | for the original study on which the present article is based |      |                                                                                                                                                          |      |
| Accessibility of protocol, raw data, and programming code |  | ..                                                           | n.a. | RECORD 22.1: Authors should provide information on how to access any supplemental information such as the study protocol, raw data, or programming code. | n.a. |

\*Reference: Benchimol EI, Smeeth L, Guttman A, Harron K, Moher D, Petersen I, Sørensen HT, von Elm E, Langan SM, the RECORD Working Committee. The REporting of studies Conducted using Observational Routinely-collected health Data (RECORD) Statement. *PLoS Medicine* 2015; in press.

\*Checklist is protected under Creative Commons Attribution ([CC BY](https://creativecommons.org/licenses/by/4.0/)) license.

**Figure 1.** Flowchart of patient inclusion

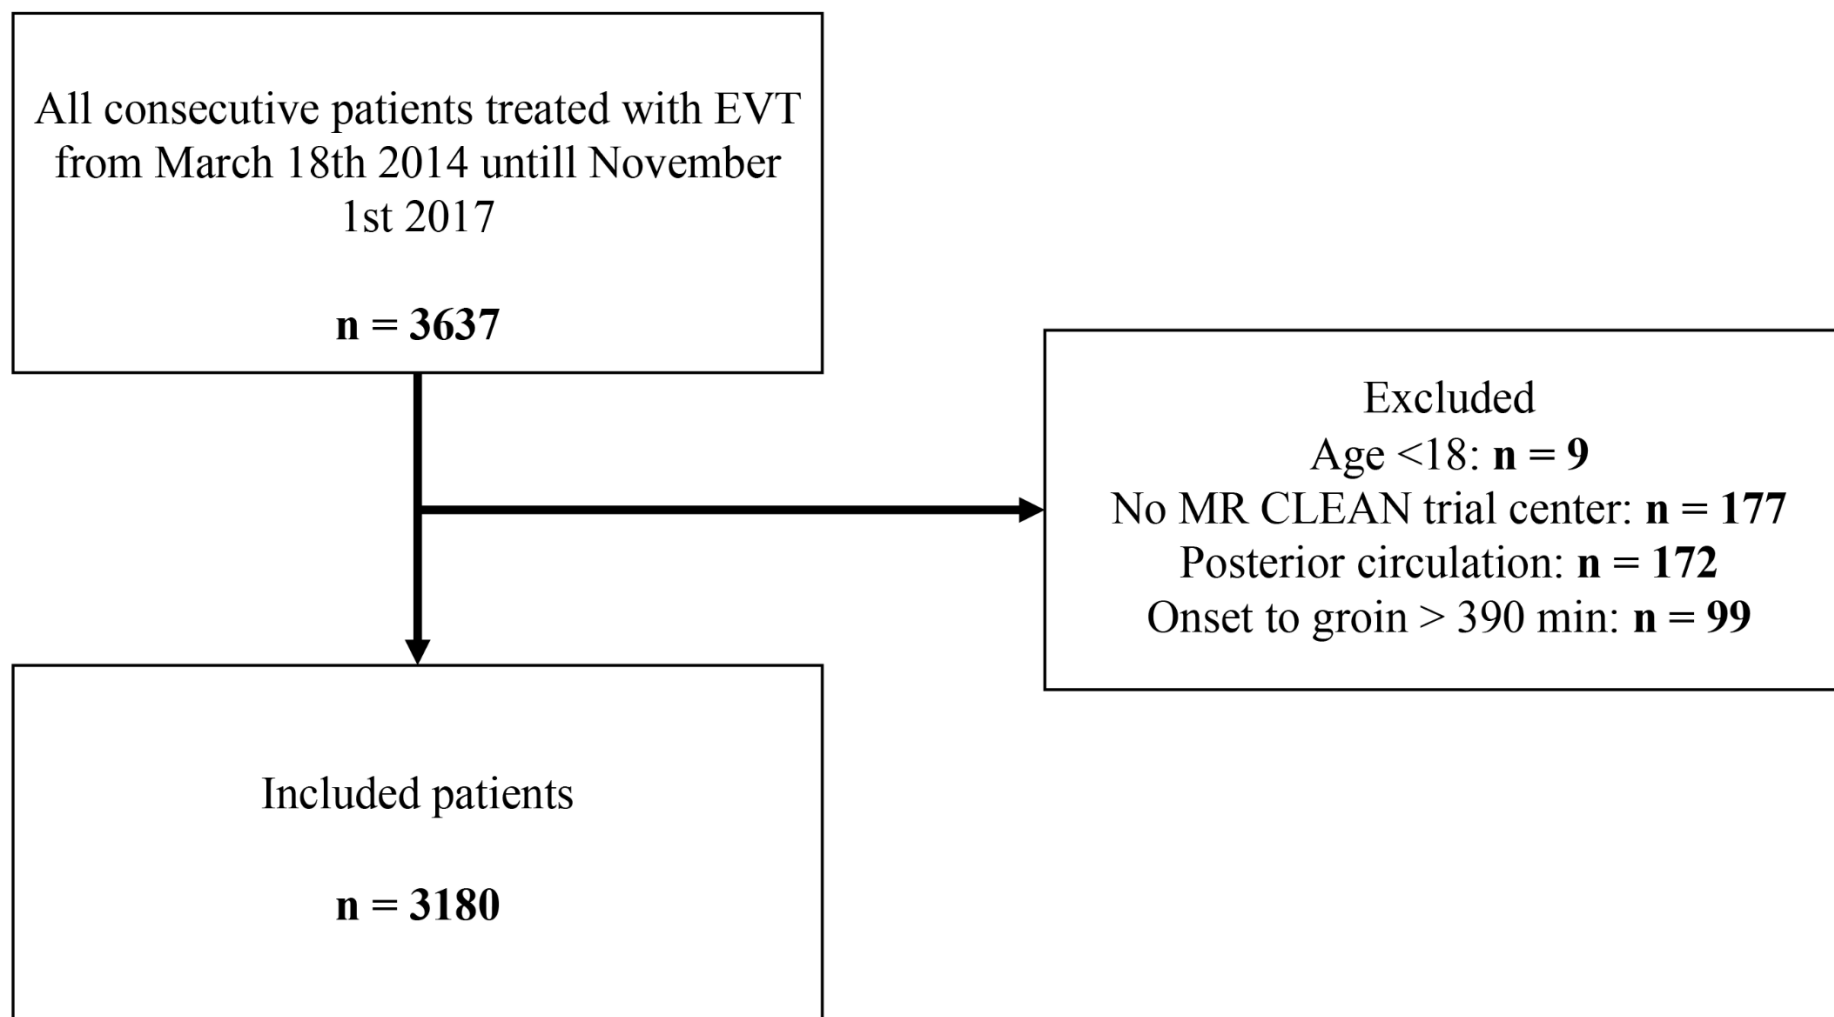

**Figure 2.** Cumulative survival from day 1 to day 90 stratified by stroke severity after treatment

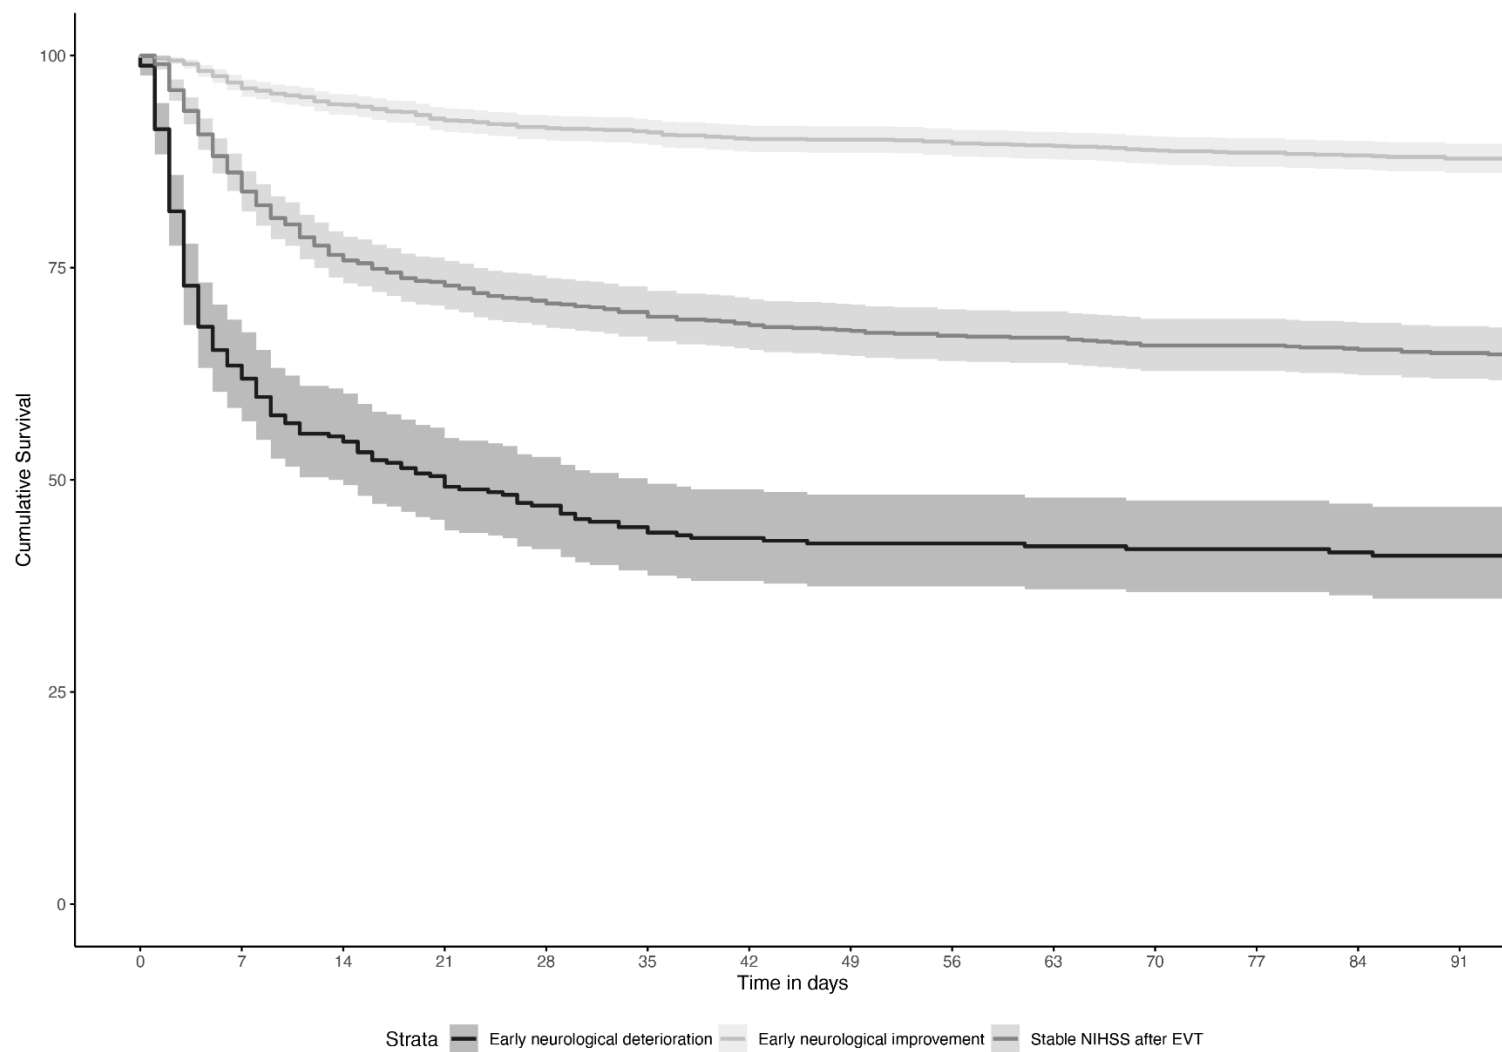

**Abbreviations:** NIHSS = national institute of health stroke scale, EVT = endovascular treatment

**Table 2.** Sensitivity analysis without imputed data

| <b>Predictors*</b>                       | <b>Odds Ratio (95% CI)</b> |
|------------------------------------------|----------------------------|
| Age                                      | 1.06 (1.04-1.08)           |
| Functional dependency <sup>†</sup>       | 1.87 (1.06-3.30)           |
| Glucose at baseline                      | 1.14 (1.05-1.23)           |
| CRP at baseline                          | 1.01 (1.00-1.02)           |
| Absent collaterals                       | 3.33 (1.40-7.90)           |
| Collateral filling <50% of occluded area | 2.37 (1.25-4.52)           |
| History of diabetes                      | 2.43 (1.38-4.28)           |
| Previous use of APT                      | 1.66 (1.01-2.75)           |
| NIHSS at 24-48 hours                     | 1.21 (1.17-1.25)           |

\* all numbers are odds ratio's with corresponding 95% confidence interval

† modified Rankin scale (mRS) of 3 or higher at baseline

**Abbreviations:** CRP = c-reactive protein, APT = anti platelet therapy, NIHSS = national institute of health stroke scale

**Table 3. Predictor values with a missing percentage of 5% or higher**

| <b>Predictors*</b>        | <b>Missing values n (%)</b> |
|---------------------------|-----------------------------|
| CRP                       | 642 (20.2)                  |
| INR                       | 597 (18.8)                  |
| In-hospital stroke        | 451 (14.2)                  |
| Glucose                   | 367 (11.5)                  |
| NIHSS after 24-48 hours   | 327 (10.3)                  |
| Duration of procedure     | 283 (8.9)                   |
| Onset to end of procedure | 204 (6.4)                   |
| Collateral score          | 202 (6.4)                   |
| General anesthesia        | 194 (6.1)                   |
| Occlusion site            | 187 (5.9)                   |

**Abbreviations:** CRP = c-reactive protein, INR = international normalized ratio, NIHSS = national institute of health stroke scale



**Supplemental table 4.** Difference in determined causes of death between part 1 and part 2 of the registry

| Cause*                                  | All patients | Part 1                 | Part 2                    |
|-----------------------------------------|--------------|------------------------|---------------------------|
|                                         |              | April 2014 - June 2016 | June 2016 – November 2017 |
|                                         | n = 821      | n= 378                 | n= 443                    |
| Pneumonia                               | 215 (26.2)   | 87 (23.0)              | 128 (28.9)                |
| Intracranial hemorrhage <sup>†</sup>    | 142 (17.3)   | 65 (17.2)              | 77 (17.4)                 |
| Withdrawal of life sustaining treatment | 110 (13.4)   | 53 (14.0)              | 57 (12.9)                 |
| Space-occupying infarction              | 101 (12.3)   | 55 (14.6)              | 46 (10.4)                 |
| Stroke progression                      | 56 (6.8)     | 25 (6.6)               | 31 (7.0)                  |
| Cardiac death                           | 45 (5.5)     | 23 (6.1)               | 22 (5.0)                  |
| Recurrent ischemic stroke               | 29 (3.5)     | 14 (3.7)               | 15 (3.4)                  |

|                                     |          |          |          |
|-------------------------------------|----------|----------|----------|
| Withholding artificial food         | 18 (2.2) | 11 (2.9) | 7 (1.6)  |
| Infection, other                    | 16 (1.9) | 4 (1.1)  | 12 (2.7) |
| Cancer                              | 15 (1.8) | 6 (1.6)  | 9 (2.0)  |
| Neurological deterioration e.c.i. ‡ | 15 (1.8) | 6 (1.6)  | 9 (2.0)  |
| Sudden death                        | 14 (1.7) | 5 (1.3)  | 9 (2.0)  |
| Extracranial hemorrhage             | 11 (1.3) | 6 (1.6)  | 5 (1.1)  |
| Respiratory insufficiency, other    | 11 (1.3) | 3 (0.8)  | 8 (1.8)  |
| Urinary tract infection             | 10 (1.2) | 9 (2.4)  | 1 (0.2)  |
| Renal failure                       | 4 (0.5)  | 1 (0.3)  | 3 (0.7)  |
| Pulmonary embolism                  | 3 (0.4)  | 1 (0.3)  | 2 (0.5)  |
| Multi-organ failure                 | 2 (0.2)  | 2 (0.5)  | 0 (0.0)  |
| Endocarditis                        | 1 (0.1)  | 0 (0.0)  | 1 (0.3)  |

|                    |         |         |         |
|--------------------|---------|---------|---------|
| Acute abdomen      | 1 (0.1) | 1 (0.3) | 0 (0.0) |
| Euthanasia         | 1 (0.1) | 1 (0.3) | 0 (0.0) |
| Status epilepticus | 1 (0.1) | 1 (0.3) | 0 (0.0) |

---

\* all numbers are n (%) unless stated otherwise, † any type of symptomatic (NIHSS increase  $\geq 4$ ) intracranial hemorrhage (Heidelberg Bleeding Classification I, II or III), ‡ patients who died after new focal deficits or coma without an apparent cause in whom no imaging was performed

**Abbreviations:** e.c.i. = e causa ignota, COPD = chronic obstructive pulmonary disease

## **Table 5. MR CLEAN Registry Investigators**

### **Executive committee**

Diederik W.J. Dippel<sup>1</sup>; Aad van der Lugt<sup>2</sup>; Charles B.L.M. Majoie<sup>3</sup>; Yvo B.W.E.M. Roos<sup>4</sup>; Robert J. van Oostenbrugge<sup>5,41</sup>; Wim H. van Zwam<sup>6,41</sup>; Jelis Boiten<sup>14</sup>; Jan Albert Vos<sup>8</sup>

### **Study coordinators**

Ivo G.H. Jansen<sup>3</sup>; Maxim J.H.L. Mulder<sup>1,2</sup>; Robert- Jan B. Goldhoorn<sup>5,6,41</sup>; Kars C.J. Compagne<sup>2</sup>; Manon Kappelhof<sup>3</sup>; Josje Brouwer<sup>4</sup>; Sanne J. den Hartog<sup>1,2,40</sup>; Wouter H. Hinsenveld<sup>5,6</sup>;

### **Local principal investigators**

Diederik W.J. Dippel<sup>1</sup>; Bob Roozenbeek<sup>1</sup>; Aad van der Lugt<sup>2</sup>; Adriaan C.G.M. van Es<sup>2</sup>; Charles B.L.M. Majoie<sup>3</sup>; Yvo B.W.E.M. Roos<sup>4</sup>; Bart J. Emmer<sup>3</sup>; Jonathan M. Coutinho<sup>4</sup>; Wouter J. Schonewille<sup>7</sup>; Jan Albert Vos<sup>8</sup>; Marieke J.H. Wermer<sup>9</sup>; Marianne A.A. van Walderveen<sup>10</sup>; Julie Staals<sup>5,41</sup>; Robert J. van Oostenbrugge<sup>5,41</sup>; Wim H. van Zwam<sup>6,41</sup>; Jeannette Hofmeijer<sup>11</sup>; Jasper M. Martens<sup>12</sup>; Geert J. Lycklama à Nijeholt<sup>13</sup>; Jelis Boiten<sup>14</sup>; Sebastiaan F. de Bruijn<sup>15</sup>; Lukas C. van Dijk<sup>16</sup>; H. Bart van der Worp<sup>17</sup>; Rob H. Lo<sup>18</sup>; Ewoud J. van Dijk<sup>19</sup>; Hieronymus D. Boogaarts<sup>20</sup>; J. de Vries<sup>22</sup>; Paul L.M. de Kort<sup>21</sup>; Julia van Tuijl<sup>21</sup>; Jo P. Peluso<sup>26</sup>; Puck Fransen<sup>22</sup>; Jan S.P. van den Berg<sup>22</sup>; Boudewijn A.A.M. van Hasselt<sup>23</sup>; Leo A.M.

Aerden<sup>24</sup>;René J. Dallinga<sup>25</sup>;Maarten Uyttenboogaart<sup>28</sup>;Omid Eschgi<sup>29</sup>;Reinoud P.H. Bokkers<sup>29</sup>;Tobien H.C.M.L. Schreuder<sup>30</sup>;Roel J.J. Heijboer<sup>31</sup>;Koos Keizer<sup>32</sup>;Lonneke S.F. Yo<sup>33</sup>;Heleen M. den Hertog<sup>22</sup>;Tomas Bulut<sup>35</sup>; Paul J.A.M. Brouwers<sup>34</sup>.

### **Imaging assessment committee**

Charles B.L.M. Majoie<sup>3</sup>(chair);Wim H. van Zwam<sup>6,41</sup>;Aad van der Lugt<sup>2</sup>;Geert J. Lycklama à Nijeholt<sup>13</sup>;Marianne A.A. van Walderveen<sup>10</sup>;Marieke E.S. Sprengers<sup>3</sup>;Sjoerd F.M. Jenniskens<sup>27</sup>;René van den Berg<sup>3</sup>;Albert J. Yoo<sup>38</sup>;Ludo F.M. Beenen<sup>3</sup>;Alida A. Postma<sup>6,42</sup>; Stefan D. Roosendaal<sup>3</sup>;Bas F.W. van der Kallen<sup>13</sup>;Ido R. van den Wijngaard<sup>13</sup>;Adriaan C.G.M. van Es<sup>2</sup>;Bart J. Emmer<sup>3</sup>;Jasper M. Martens<sup>12</sup>; Lonneke S.F. Yo<sup>33</sup>;Jan Albert Vos<sup>8</sup>; Joost Bot<sup>36</sup>; Pieter-Jan van Doormaal<sup>2</sup>; Anton Meijer<sup>27</sup>;Elyas Ghariq<sup>13</sup>; Reinoud P.H. Bokkers<sup>29</sup>;Marc P. van Proosdij<sup>37</sup>;G. Menno Krietemeijer<sup>33</sup>;Jo P. Peluso<sup>26</sup>;Hieronymus D. Boogaarts<sup>20</sup>;Rob Lo<sup>18</sup>;Wouter Dinkelaar<sup>2</sup>Auke P.A. Appelman<sup>29</sup>;Bas Hammer<sup>16</sup>;Sjoert Pegge<sup>27</sup>;Anouk van der Hoorn<sup>29</sup>;Saman Vinke<sup>20</sup>.

### **Writing committee**

Diederik W.J. Dippel<sup>1</sup>(chair);Aad van der Lugt<sup>2</sup>;Charles B.L.M. Majoie<sup>3</sup>;Yvo B.W.E.M. Roos<sup>4</sup>;Robert J. van Oostenbrugge<sup>5,41</sup>;Wim H. van Zwam<sup>6,41</sup>;Geert J. Lycklama à Nijeholt<sup>13</sup>;Jelis Boiten<sup>14</sup>;Jan Albert Vos<sup>8</sup>;Wouter J. Schonewille<sup>7</sup>;Jeannette Hofmeijer<sup>11</sup>;Jasper M. Martens<sup>12</sup>;H. Bart van der Worp<sup>17</sup>;Rob H. Lo<sup>18</sup>

### **Adverse event committee**

Robert J. van Oostenbrugge<sup>5,41</sup>(chair);Jeannette Hofmeijer<sup>11</sup>;H. Zwenneke Flach<sup>23</sup>

### **Trial methodologist**

Hester F. Lingsma<sup>40</sup>

### **Research nurses / local trial coordinators**

Naziha el Ghannouti<sup>1</sup>;Martin Sterrenberg<sup>1</sup>;Wilma Pellikaan<sup>7</sup>;Rita Sprengers<sup>4</sup>;Marjan Elfrink<sup>11</sup>;Michelle Simons<sup>11</sup>;Marjolein Vossers<sup>12</sup>;Joke de

Meris<sup>14</sup>;Tamara Vermeulen<sup>14</sup>;Annet Geerlings<sup>19</sup>;Gina van Vemde<sup>22</sup>;Tiny Simons<sup>30</sup>;Gert Messchendorp<sup>28</sup>;Nynke Nicolaij<sup>28</sup>;Hester

Bongenaar<sup>32</sup>;Karin Bodde<sup>24</sup>;Sandra Kleijn<sup>34</sup>;Jasmijn Lodico<sup>34</sup>; Hanneke Droste<sup>34</sup>;Maureen Wollaert<sup>5</sup>;Sabrina Verheesen<sup>5</sup>;D. Jeurrissen<sup>5</sup>;Erna

Bos<sup>9</sup>;Yvonne Drabbe<sup>15</sup>;Michelle Sandiman<sup>15</sup>;Nicoline Aldering<sup>11</sup>;Berber Zweedijk<sup>17</sup>;Jocova Vervoort<sup>21</sup>;Eva Ponjee<sup>22</sup>;Sharon Romviel<sup>19</sup>;Karin

Kanselaar<sup>19</sup>;Denn Barning<sup>10</sup>.

### **PhD / Medical students:**

Esmee Venema<sup>40</sup>; Vicky Chalos<sup>1,40</sup>; Ralph R. Geuskens<sup>3</sup>; Tim van Straaten<sup>19</sup>; Saliha Ergezen<sup>1</sup>; Roger R.M. Harmsma<sup>1</sup>; Daan Muijres<sup>1</sup>; Anouk de Jong<sup>1</sup>; Olvert A. Berkhemer<sup>1,3,6</sup>; Anna M.M. Boers<sup>3,39</sup>; J. Huguet<sup>3</sup>; P.F.C. Groot<sup>3</sup>; Marieke A. Mens<sup>3</sup>; Katinka R. van Kranendonk<sup>3</sup>; Kilian M. Treurniet<sup>3</sup>; Manon L. Tolhuisen<sup>3,39</sup>; Heitor Alves<sup>3</sup>; Annick J. Weterings<sup>3</sup>; Eleonora L.F. Kirkels<sup>3</sup>; Eva J.H.F. Voogd<sup>11</sup>; Lieve M. Schupp<sup>3</sup>; Sabine L. Collette<sup>28,29</sup>; Adrien E.D. Groot<sup>4</sup>; Natalie E. LeCouffe<sup>4</sup>; Praneeta R. Konduri<sup>39</sup>; Haryadi Prasetya<sup>39</sup>; Nerea Arrarte-Terreros<sup>39</sup>; Lucas A. Ramos<sup>39</sup>.

### **List of affiliations**

Department of Neurology<sup>1</sup>, Radiology<sup>2</sup>, Public Health<sup>40</sup>, Erasmus MC University Medical Center;

Department of Radiology and Nuclear Medicine<sup>3</sup>, Neurology<sup>4</sup>, Biomedical Engineering & Physics<sup>39</sup>,

Amsterdam UMC, location University of Amsterdam;

Department of Neurology<sup>5</sup>, Radiology & Nuclear Medicine<sup>6</sup>, Maastricht University Medical Center+; School for Cardiovascular Diseases

Maastricht (CARIM)<sup>41</sup>; and MHeNs School for Mental Health and Neuroscience, Maastricht, the Netherlands<sup>42</sup>;

Department of Neurology<sup>7</sup>, Radiology<sup>8</sup>, Sint Antonius Hospital, Nieuwegein;

Department of Neurology<sup>9</sup>, Radiology<sup>10</sup>, Leiden University Medical Center;

Department of Neurology<sup>11</sup>, Radiology<sup>12</sup>, Rijnstate Hospital, Arnhem;

Department of Radiology<sup>13</sup>, Neurology<sup>14</sup>, Haaglanden MC, the Hague;

Department of Neurology<sup>15</sup>, Radiology<sup>16</sup>, HAGA Hospital, the Hague;

Department of Neurology<sup>17</sup>, Radiology<sup>18</sup>, University Medical Center Utrecht;

Department of Neurology<sup>19</sup>, Neurosurgery<sup>20</sup>, Radiology<sup>27</sup>, Radboud University Medical Center, Nijmegen;

Department of Neurology<sup>21</sup>, Radiology<sup>26</sup>, Elisabeth-TweeSteden ziekenhuis, Tilburg;

Department of Neurology<sup>22</sup>, Radiology<sup>23</sup>, Isala Klinieken, Zwolle;

Department of Neurology<sup>24</sup>, Radiology<sup>25</sup>, Reinier de Graaf Gasthuis, Delft;

Department of Neurology<sup>28</sup>, Radiology<sup>29</sup>, University Medical Center Groningen;



Department of Neurology<sup>30</sup>, Radiology<sup>31</sup>, Atrium Medical Center, Heerlen;

Department of Neurology<sup>32</sup>, Radiology<sup>33</sup>, Catharina Hospital, Eindhoven;

Department of Neurology<sup>34</sup>, Radiology<sup>35</sup>, Medisch Spectrum Twente, Enschede;

Department of Radiology<sup>36</sup>, Amsterdam UMC, Vrije Universiteit van Amsterdam, Amsterdam;

Department of Radiology<sup>37</sup>, Noordwest Ziekenhuisgroep, Alkmaar;

Department of Radiology<sup>38</sup>, Texas Stroke Institute, Texas, United States of America.
